# Supplementary material for: An optimized toolkit for high-molecular-weight DNA extraction and ultra-long-read nanopore sequencing using glass beads and hexamminecobalt(III) chloride
Source: HighWire-hosted journal article supplement (doi:10.1101/gr.279943.124), 2025-03-24
Supplement: Supplemental_Figure_S02.pdf [file Supplemental_Figure_S02.pdf]

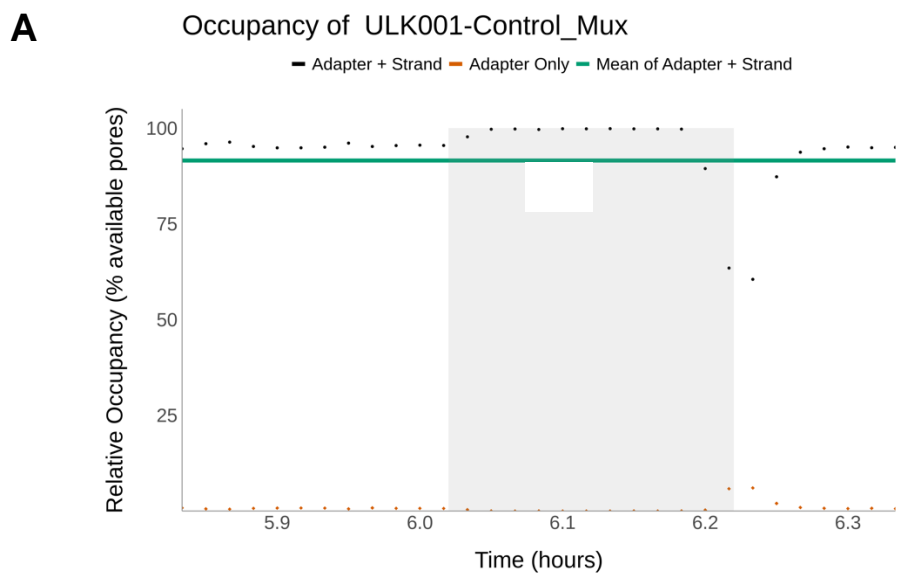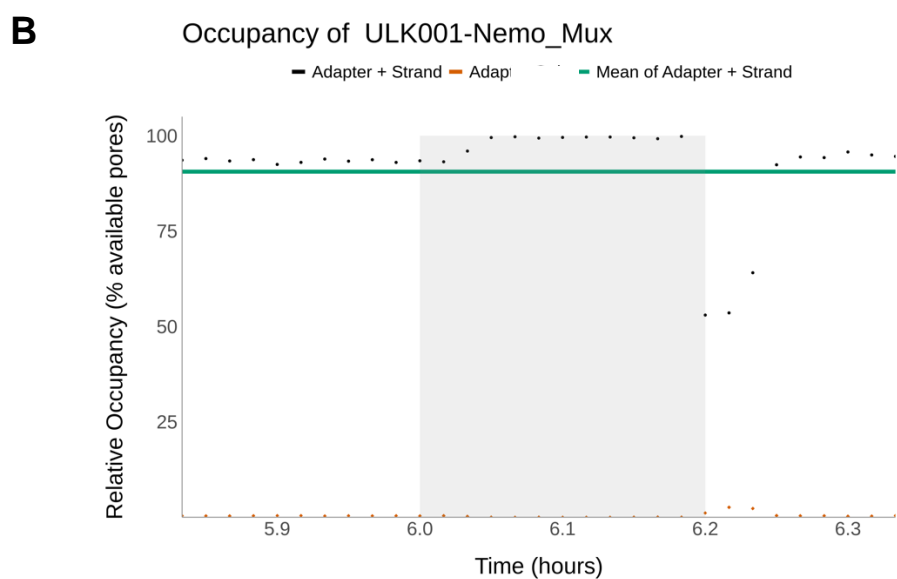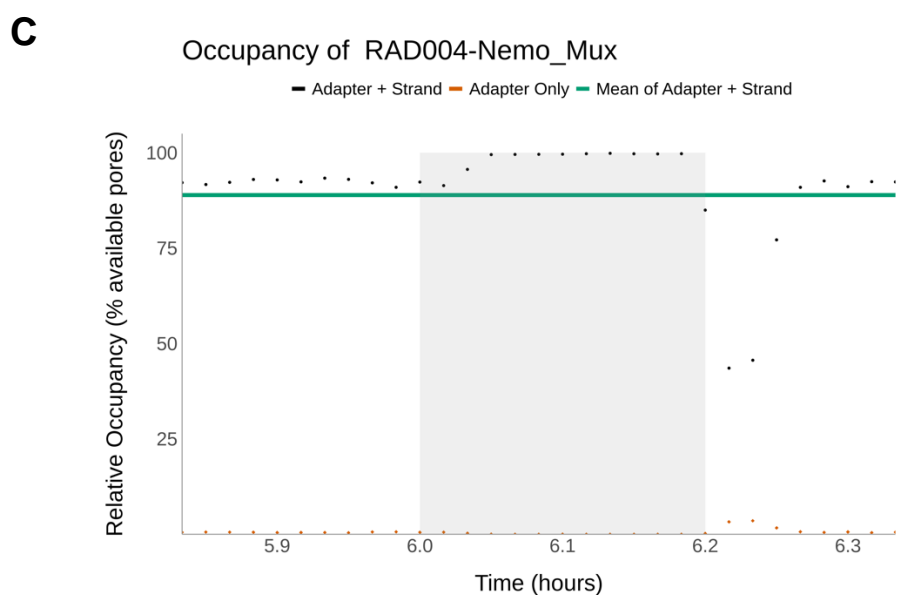

**Figure S2.** Zoomed-in of occupancy time lapse around mux scan. Due to the “wind-down” time, where non sequencing pores are gradually switched off during the lead into a mux scan, there are time points when relative occupancy reaches 100%
