# Supplementary material for: An optimized toolkit for high-molecular-weight DNA extraction and ultra-long-read nanopore sequencing using glass beads and hexamminecobalt(III) chloride
Source: HighWire-hosted journal article supplement (doi:10.1101/gr.279943.124), 2025-03-24
Supplement: Supplemental_Figure_S03.pdf [file Supplemental_Figure_S03.pdf]

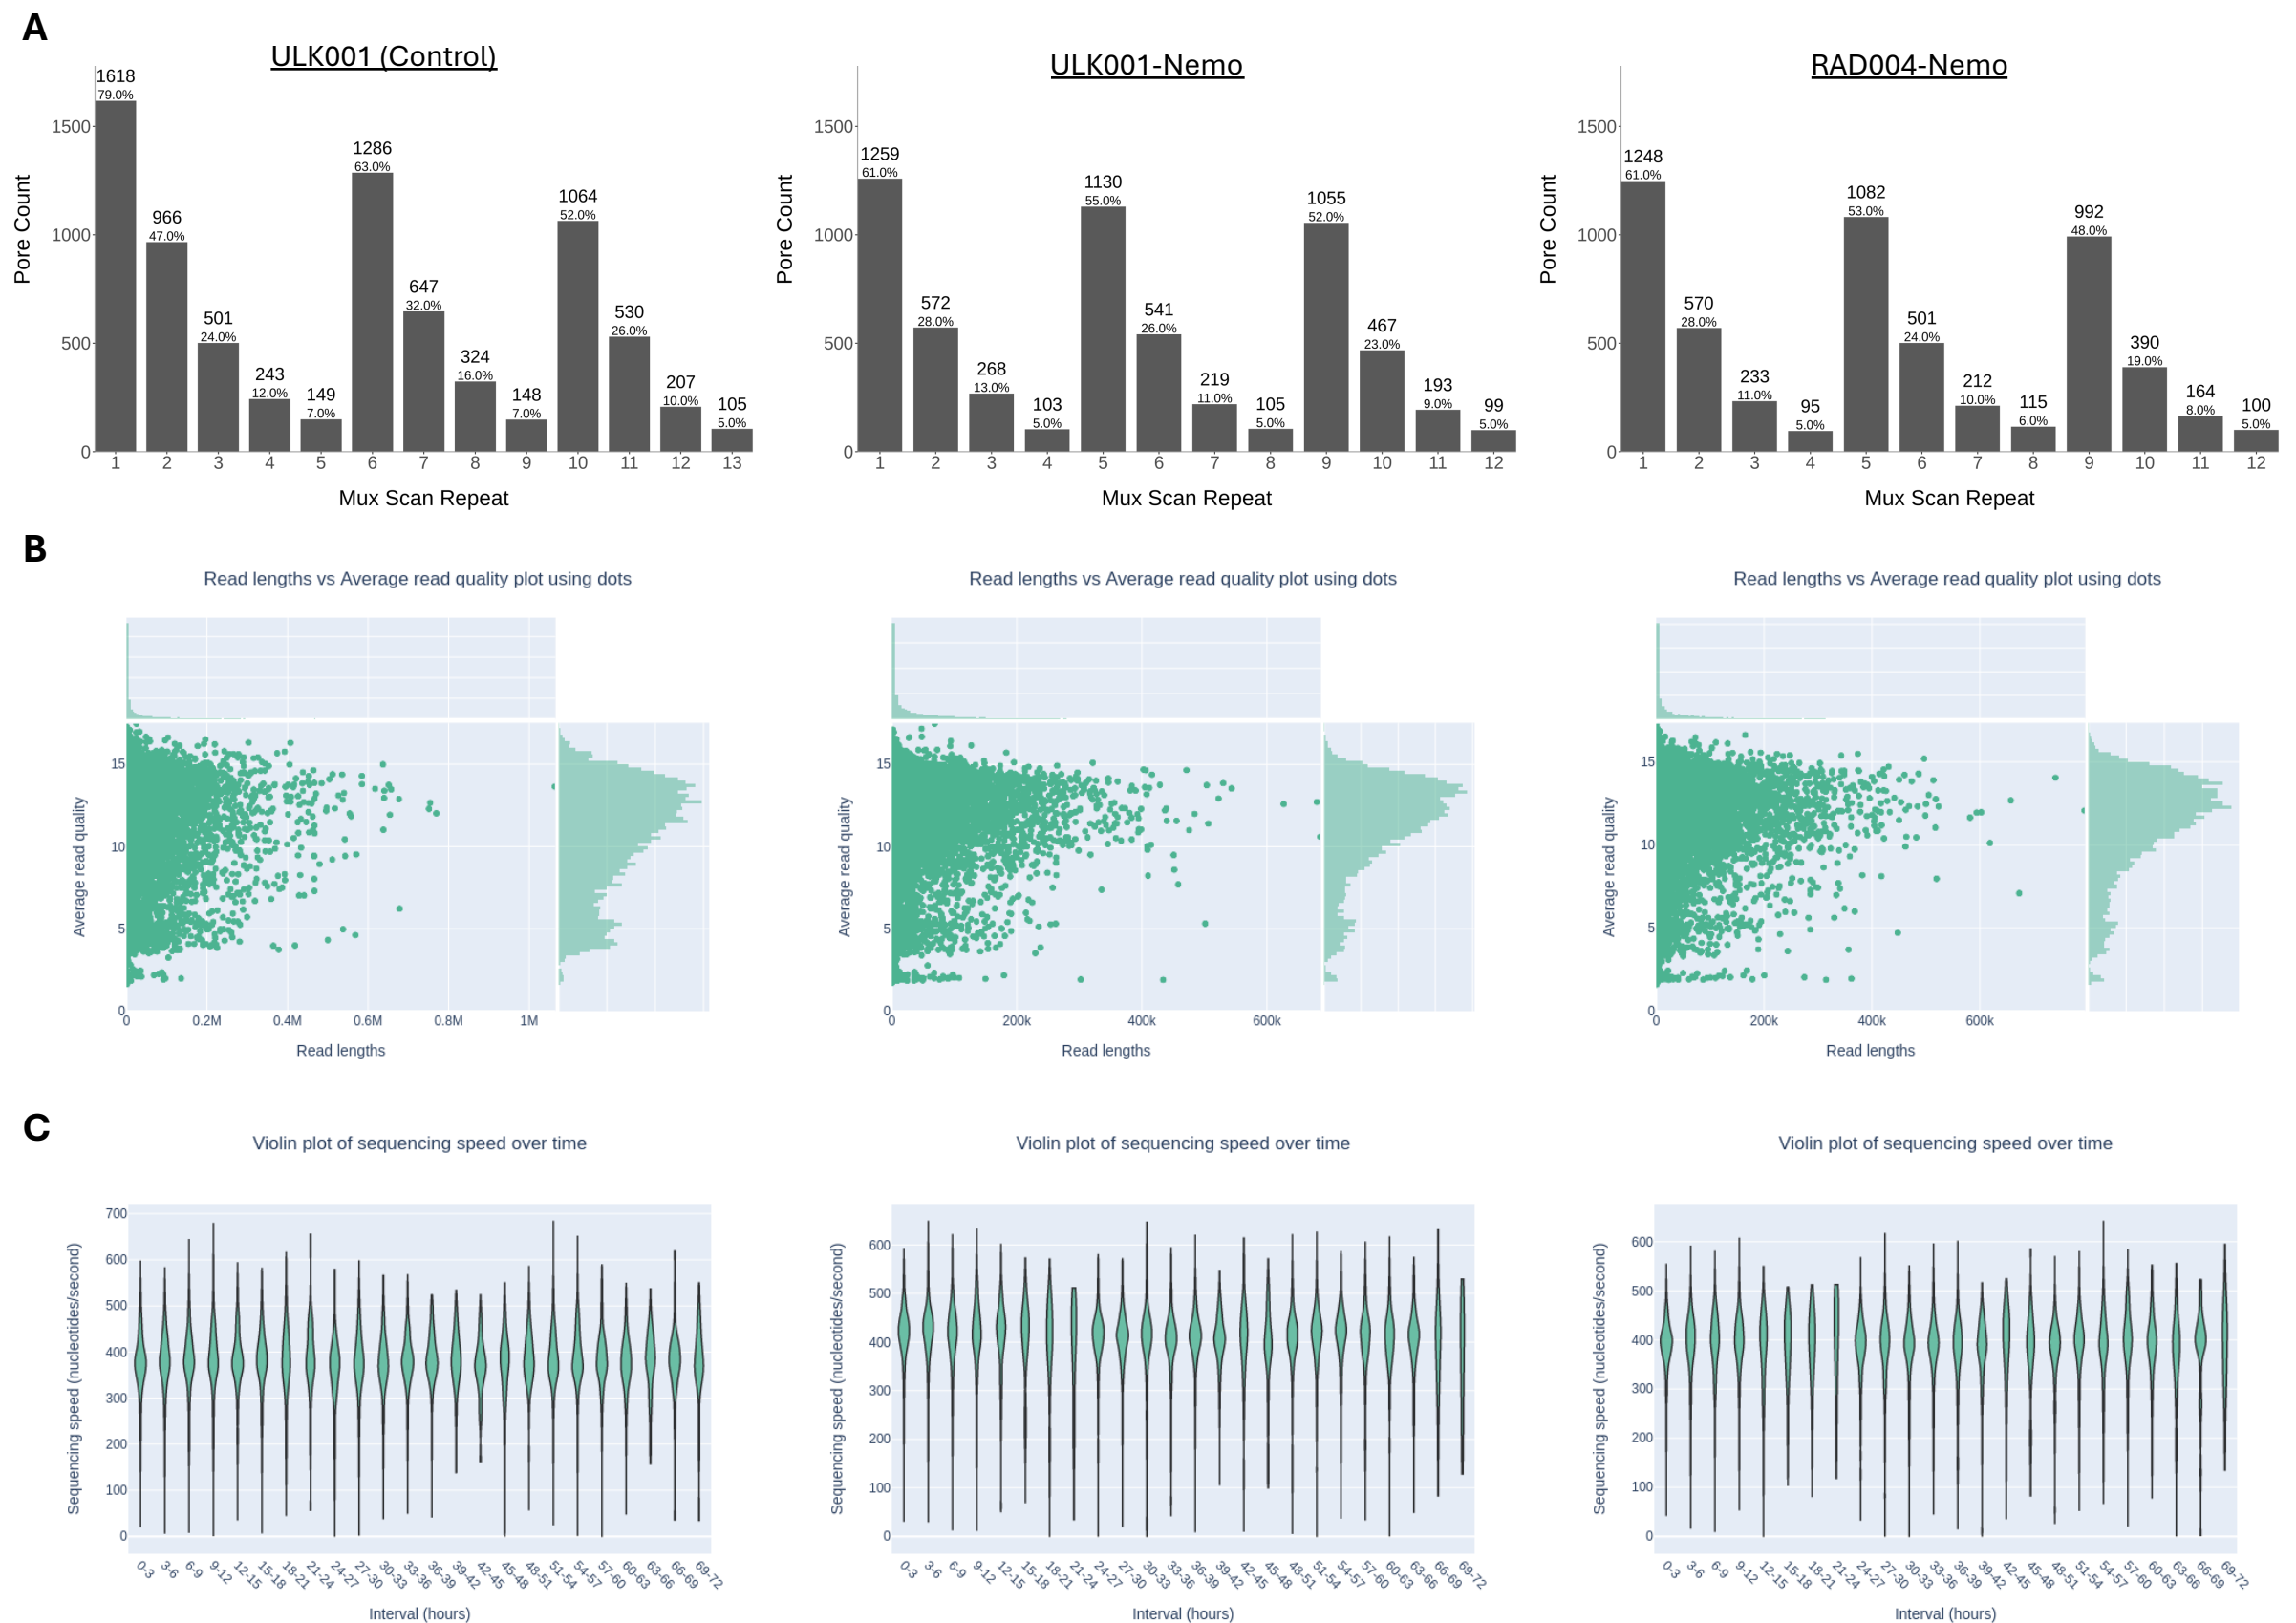

**Figure S3.** (a) The numbers of available pores after every 6-hour (*i.e.* mux scan) are shown above a percentage of the maximum pore number (*i.e.* 2048). Length and quality score distributions were similar between the three protocols (b) as well as their sequencing speed (c). Plots (b) and (c) were created by NanoPlot (de Coster 2018). Each loaded library was equivalent to DNA from 3 million GM12878 cells.
