# Supplementary material for: An optimized toolkit for high-molecular-weight DNA extraction and ultra-long-read nanopore sequencing using glass beads and hexamminecobalt(III) chloride
Source: HighWire-hosted journal article supplement (doi:10.1101/gr.279943.124), 2025-03-24
Supplement: Supplemental_Figure_S04.pdf [file Supplemental_Figure_S04.pdf]

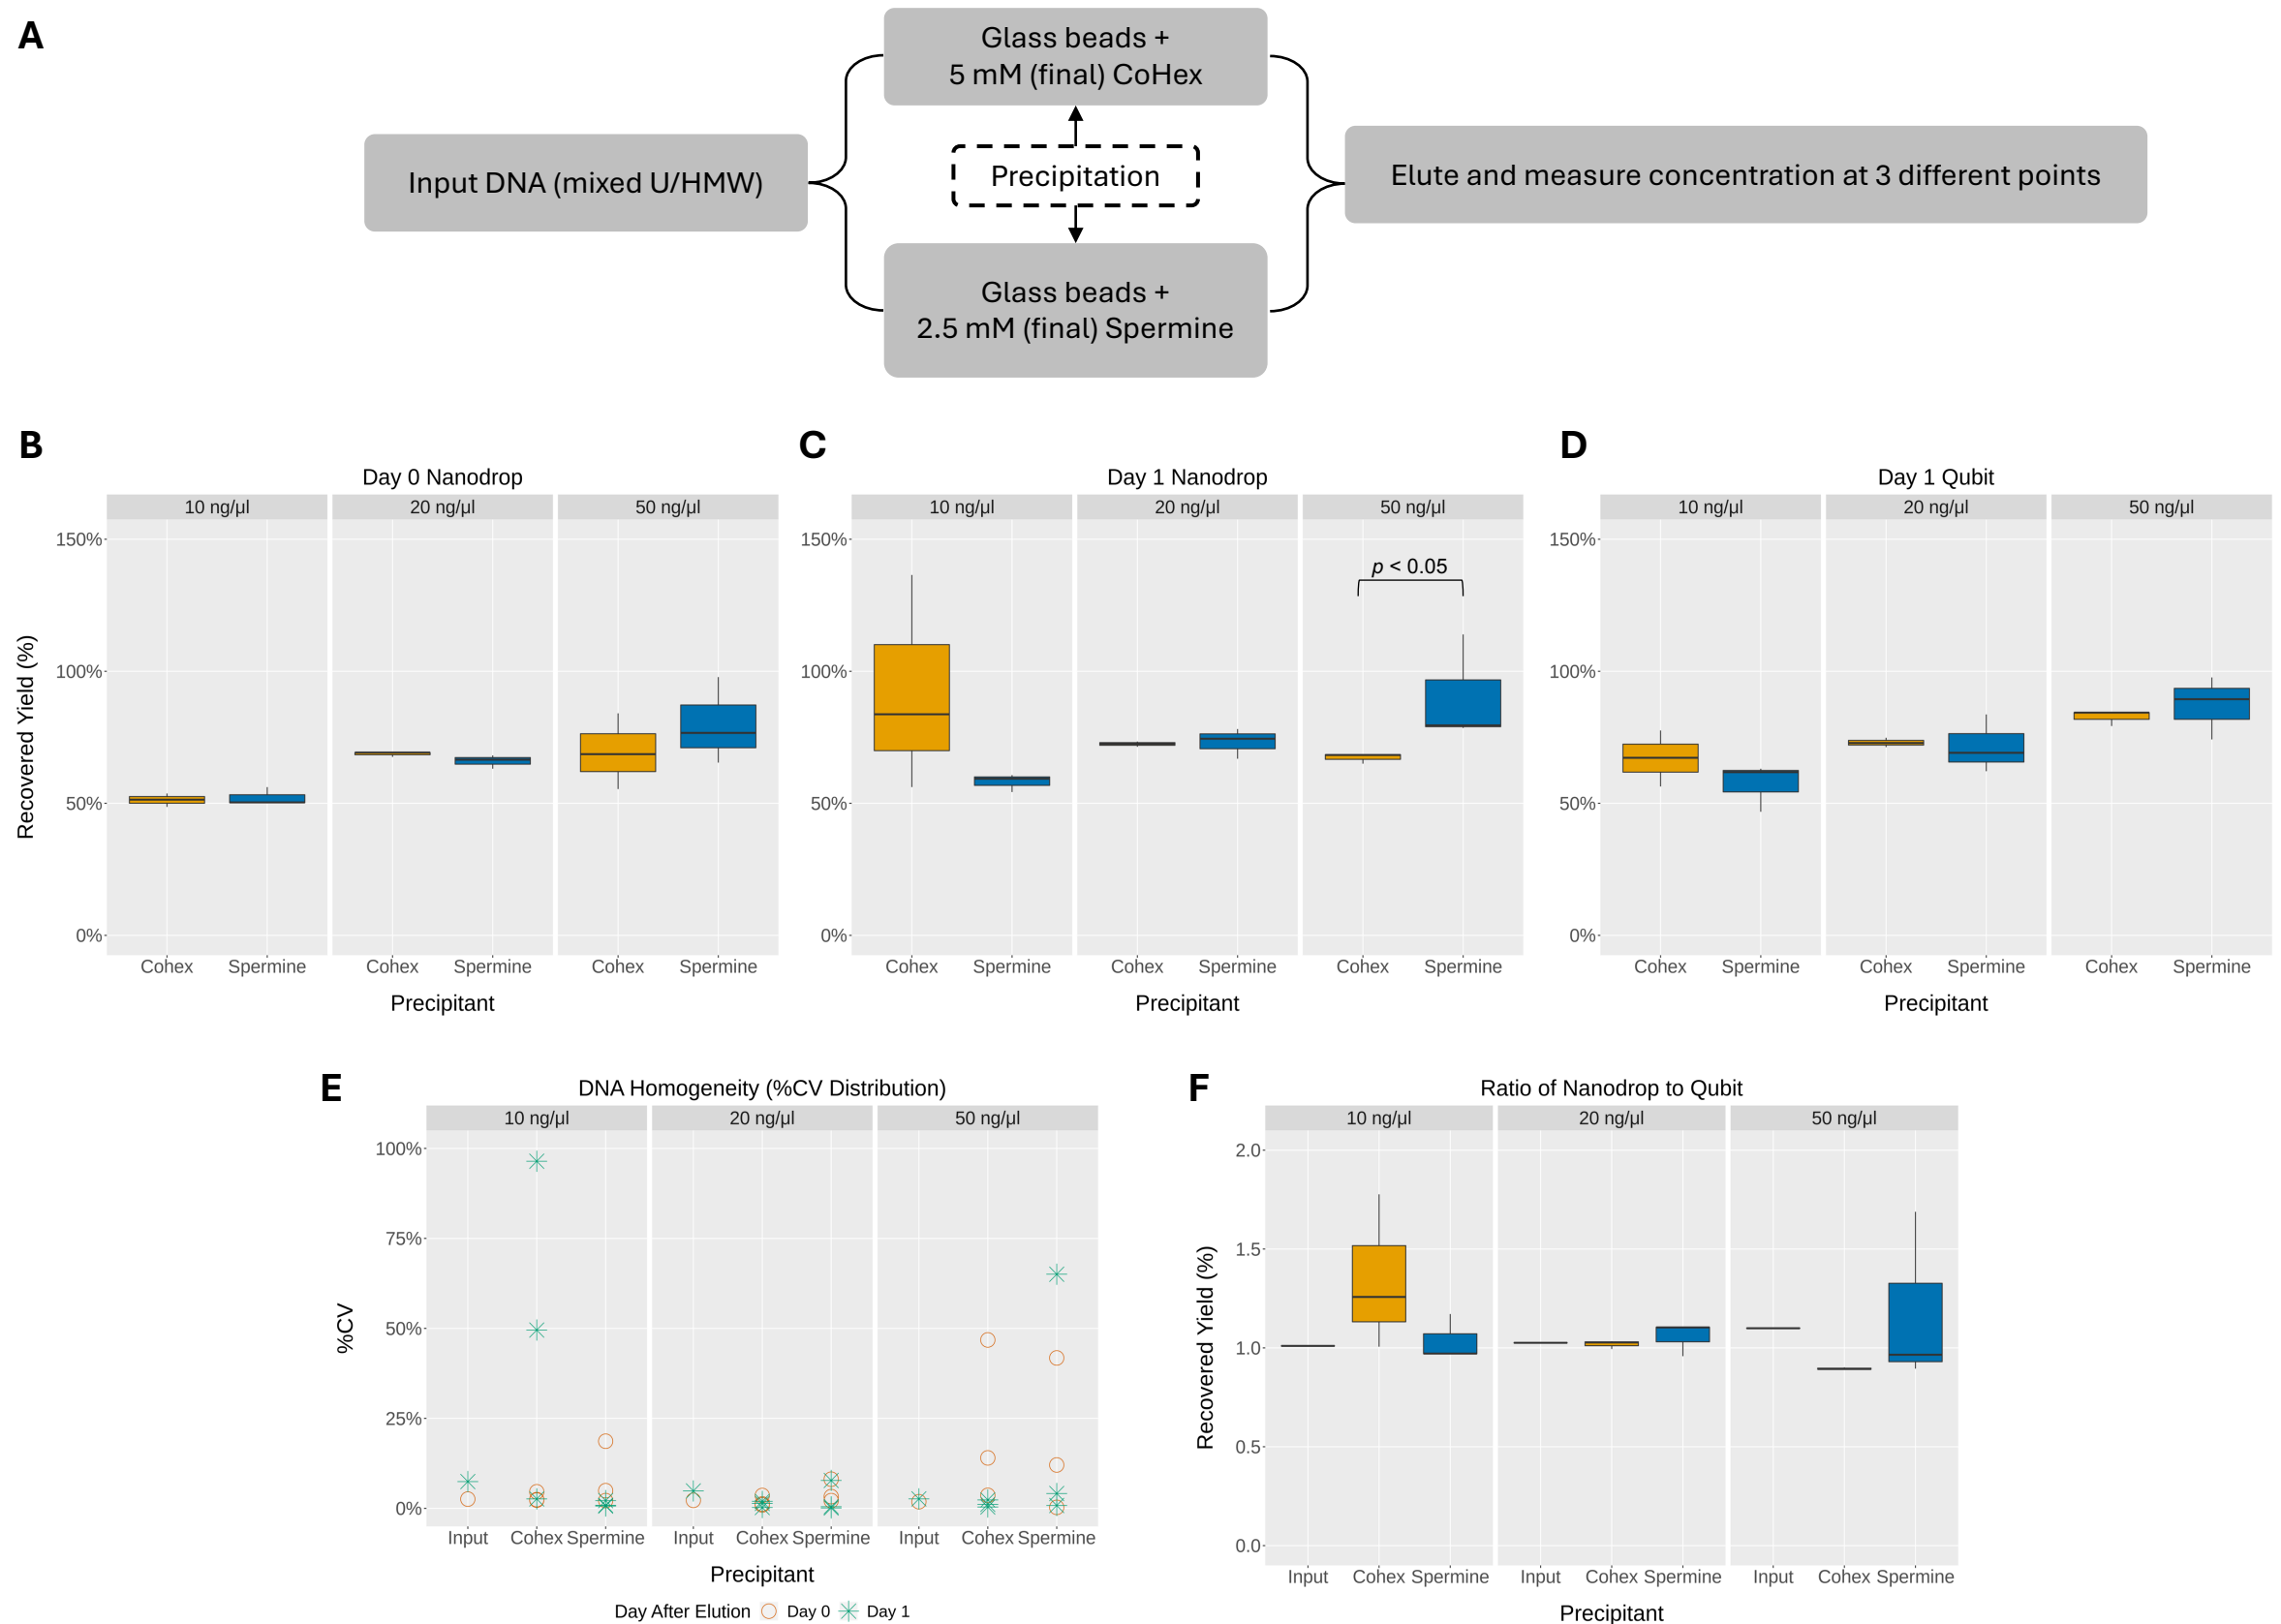

**Figure S4.** DNA recovery using CoHex and spermine. (a) Workflow of the experiment, (b) Nanodrop measurements of DNA recovery a few hours after elution (Day 0), (c) Nanodrop measurements of DNA recovery after one day (Day 1), (d) Qubit measurements of DNA recovery after one day (Day 1), (e) Homogeneity of samples as measured by %CVs using Nanodrop at Day 0 and Day 1, (f) Ratios of values between Qubit and Nanodrop measurements. DNA was extracted from GM12878 cells and diluted to the respective concentrations (input sample  $n=1$ , output samples  $n=3$ ).
