# Supplementary material for: An optimized toolkit for high-molecular-weight DNA extraction and ultra-long-read nanopore sequencing using glass beads and hexamminecobalt(III) chloride
Source: HighWire-hosted journal article supplement (doi:10.1101/gr.279943.124), 2025-03-24
Supplement: Supplemental_Figure_S05.pdf [file Supplemental_Figure_S05.pdf]

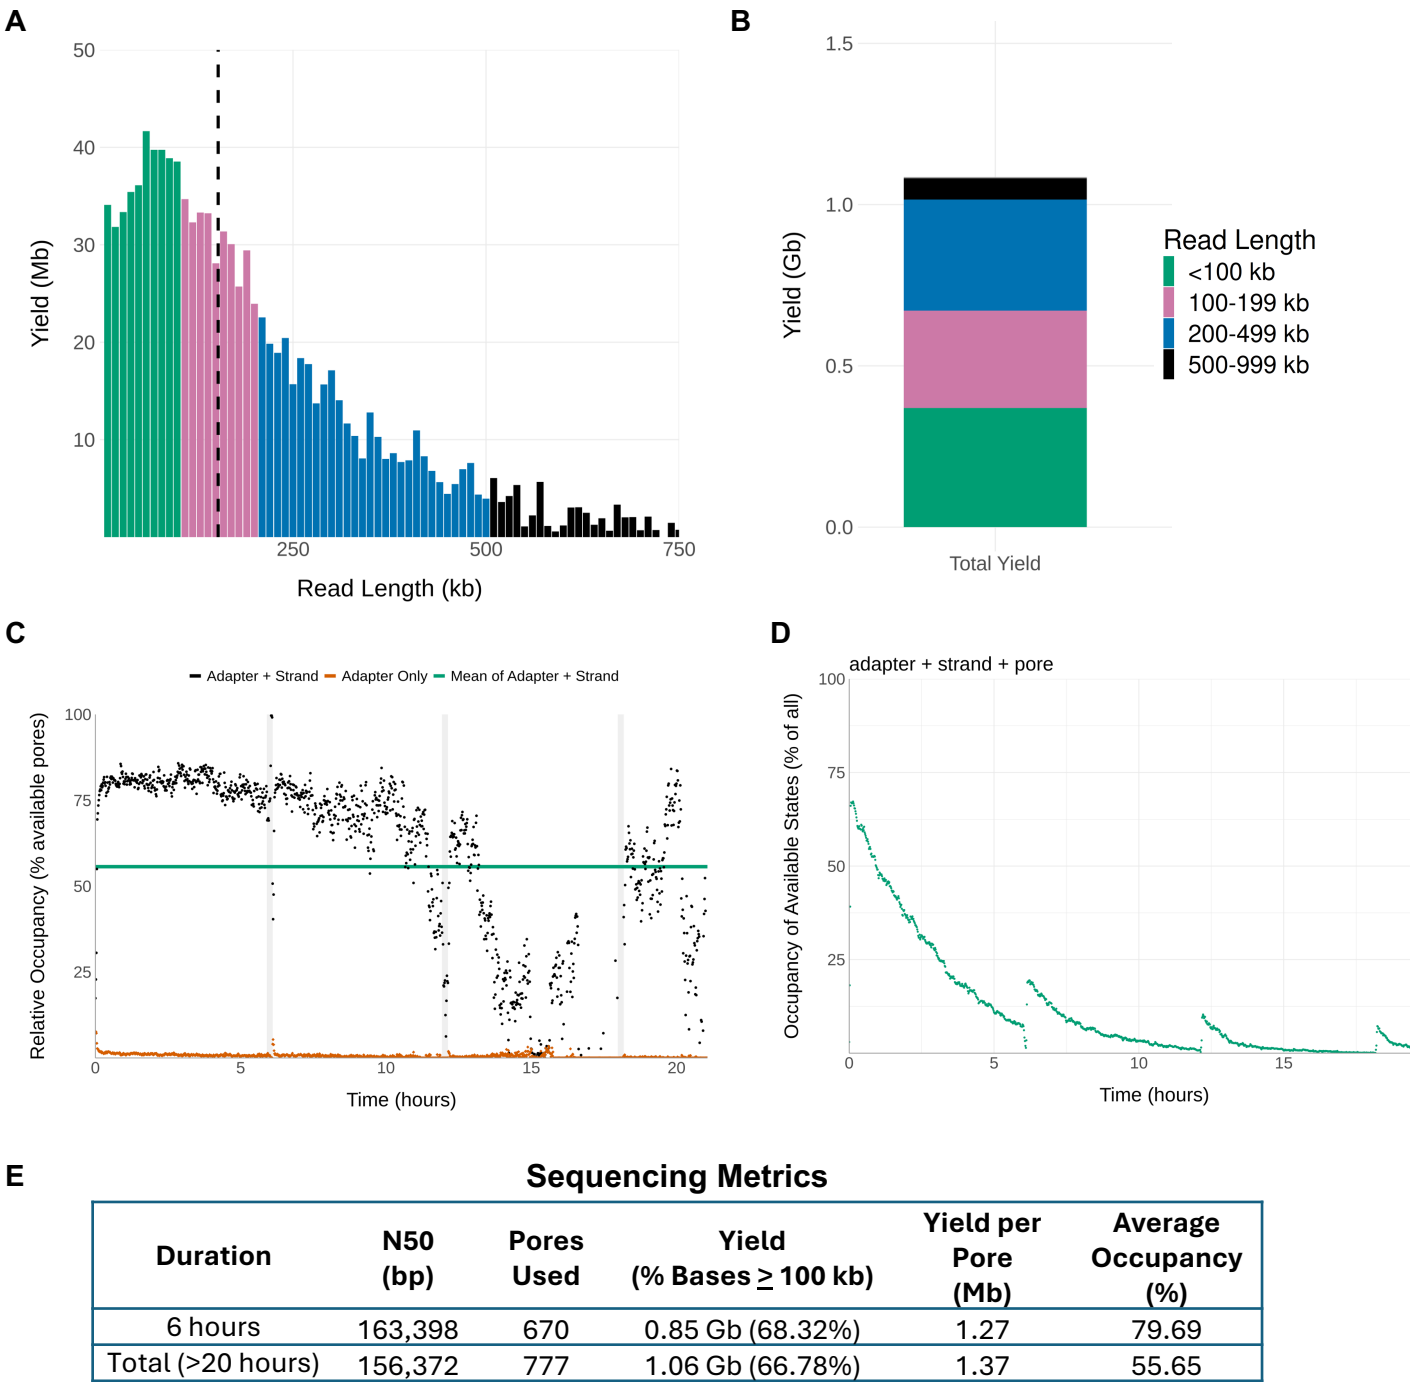

**Figure S5.** Sequencing output of a concentrated UL library, marked by UL N50 but lower occupancy and yield. (a) Read length distribution with N50 marked by the black dashed line, (b) Total yield distribution by read lengths, (c) Time lapse of relative occupancy, (d) Time lapse of available pores showing mux scan at every ~6 hours, (e) Sequencing metrics are at 6 hours and at the end of data collection (excluding the first 10 minutes). Library was prepared from GM12878 cells, extracted DNA concentration was >60 ng/ $\mu$ l, loaded on a MinION flow cell and sequenced on the GridION platform.
