# Supplementary material for: An optimized toolkit for high-molecular-weight DNA extraction and ultra-long-read nanopore sequencing using glass beads and hexamminecobalt(III) chloride
Source: HighWire-hosted journal article supplement (doi:10.1101/gr.279943.124), 2025-03-24
Supplement: Supplemental_Figure_S06.pdf [file Supplemental_Figure_S06.pdf]

**A**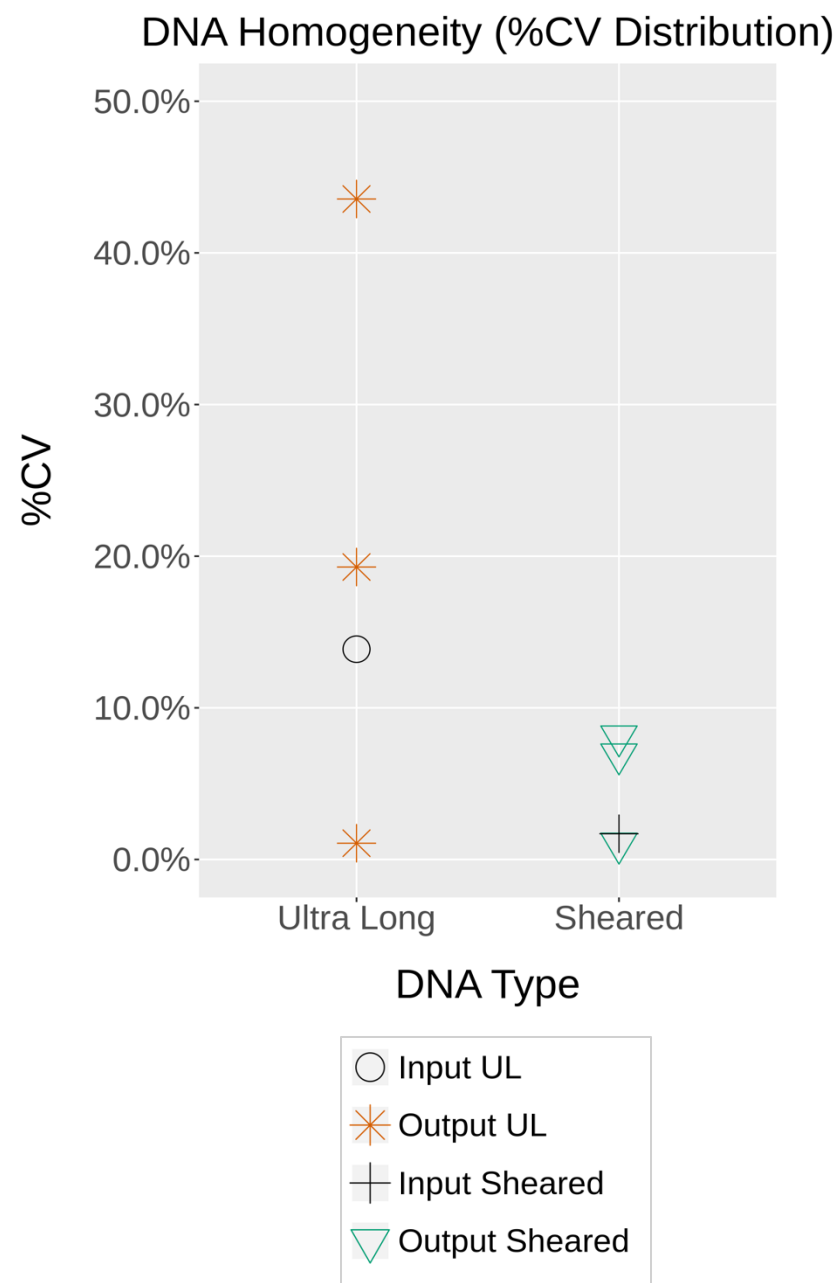**B**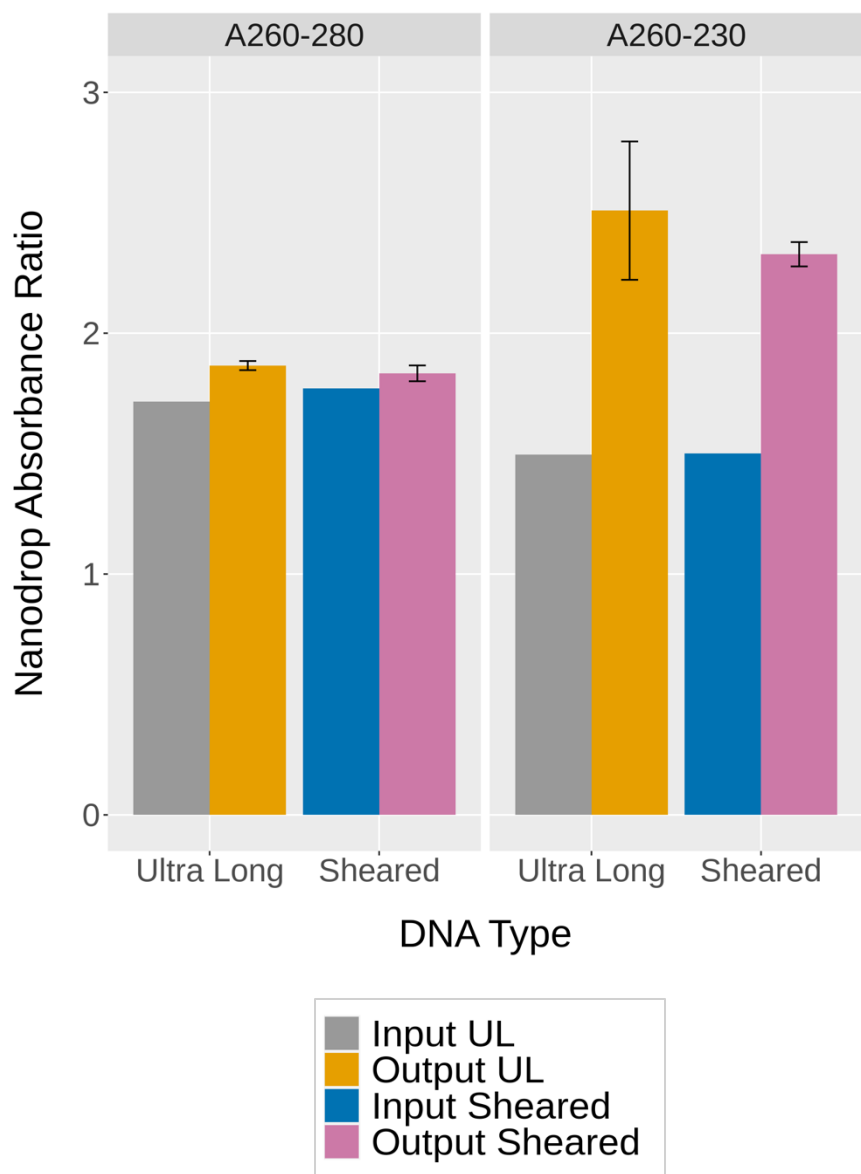**C**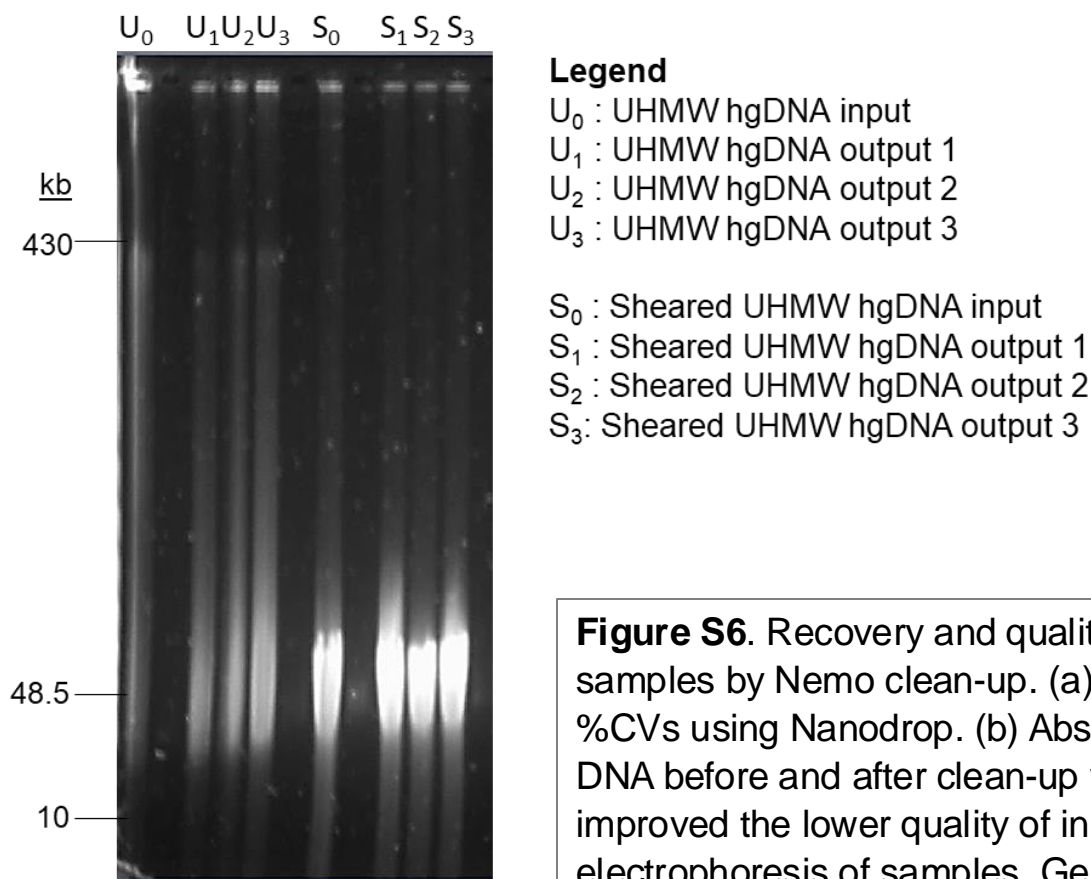

**Figure S6.** Recovery and quality control of UHMW vs sheared DNA samples by Nemo clean-up. (a) Homogeneity of samples as measured by %CVs using Nanodrop. (b) Absorbance measurements (Nanodrop) of DNA before and after clean-up with Nemo protocol. Nemo clean-up improved the lower quality of input DNA. (c) Pulsed-field gel electrophoresis of samples. Gel concentration was 0.75%, run with Pippin Pulse at the preset mode of '5-430 kb' for 16 hours. UHMW and sheared DNA was extracted from GM12878 cells, diluted to a concentration of ~15 ng/μl (input sample  $n=1$ , output samples  $n=3$ ).
