# Supplementary material for: An optimized toolkit for high-molecular-weight DNA extraction and ultra-long-read nanopore sequencing using glass beads and hexamminecobalt(III) chloride
Source: HighWire-hosted journal article supplement (doi:10.1101/gr.279943.124), 2025-03-24
Supplement: Supplemental_Figure_S08.pdf [file Supplemental_Figure_S08.pdf]

A

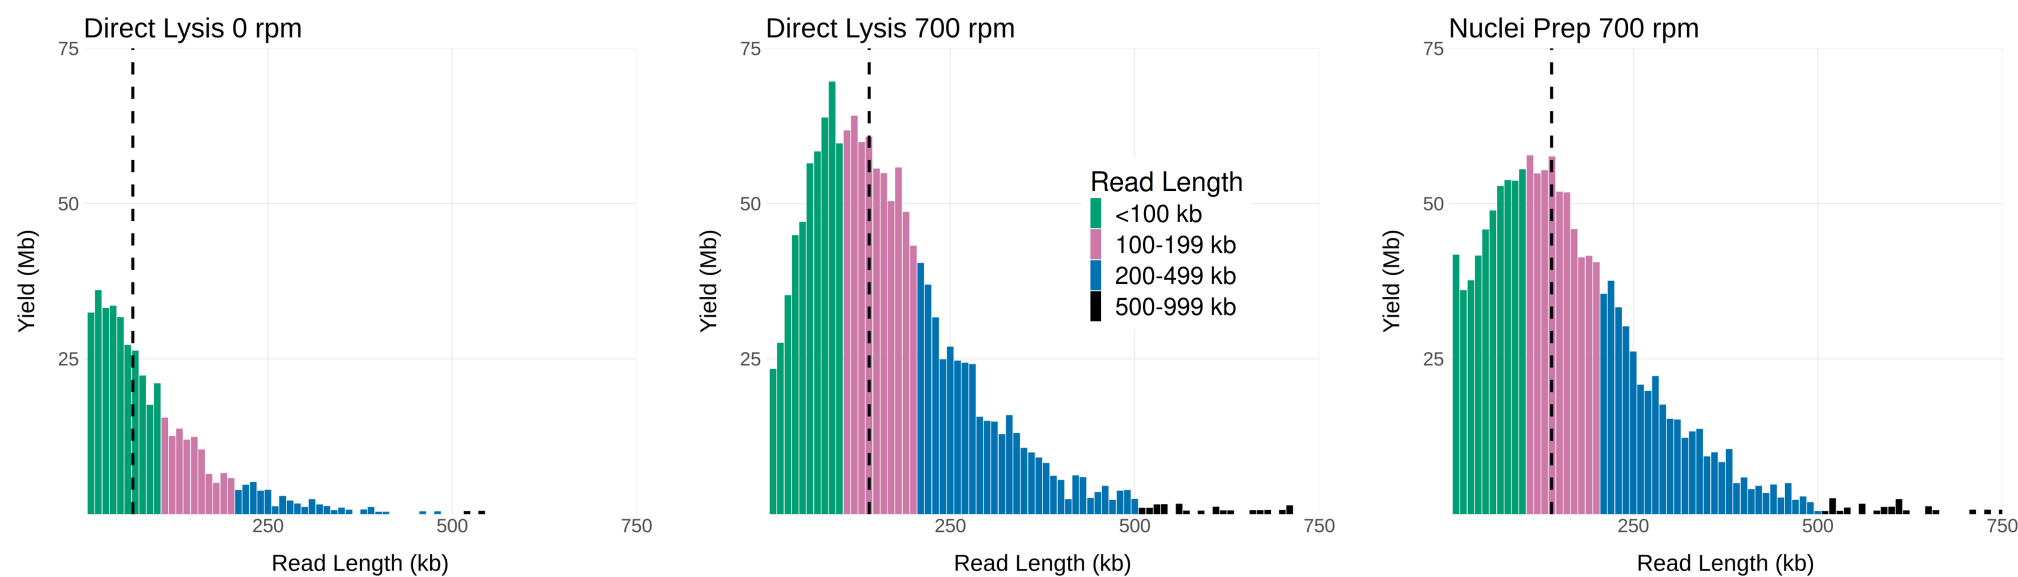

B

Sequencing Metrics at 6 Hours of Run

| Sample               | N50 (bp) | Pores Used | Yield (%Bases $\geq$ 100 kb) | Yield per Pore (Mb) | Average Occupancy (%) |
|----------------------|----------|------------|------------------------------|---------------------|-----------------------|
| Direct Lysis 0 rpm   | 67,006   | 282        | 0.41 Gb (34.05%)             | 1.46                | 55.92                 |
| Direct Lysis 700 rpm | 142,923  | 933        | 1.42 Gb (67.73%)             | 1.53                | 79.02                 |
| Nuclei Prep 700 rpm  | 141,094  | 897        | 1.36 Gb (66.69%)             | 1.51                | 61.19                 |

**Figure S8.** Performance of UL sequencing of libraries extracted with different lysis approaches using Monarch kit, i.e. Direct Lysis vs Nuclei Prep method. Direct lysis approach produced slightly better sequencing metrics than Nuclei Prep. (a) Read length histograms of the runs, (b) Sequencing metrics of the runs at 6 hours (excluding the first 10 minutes). All libraries were prepared from GM12878 cells, loaded on MinION flow cells R9.4 and sequenced on the GridION platform. For the indicated agitation speed, samples were shaken for 10 minutes at 56°C.
