# Supplementary material for: An optimized toolkit for high-molecular-weight DNA extraction and ultra-long-read nanopore sequencing using glass beads and hexamminecobalt(III) chloride
Source: HighWire-hosted journal article supplement (doi:10.1101/gr.279943.124), 2025-03-24
Supplement: Supplemental_Figure_S09.pdf [file Supplemental_Figure_S09.pdf]

A

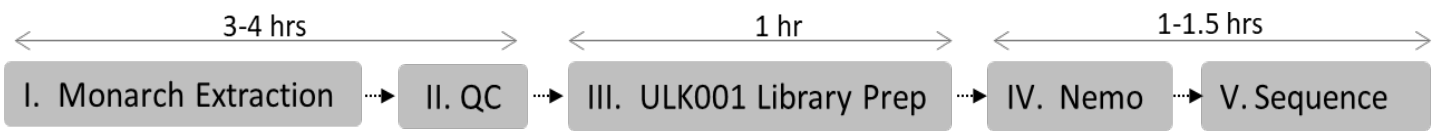

B

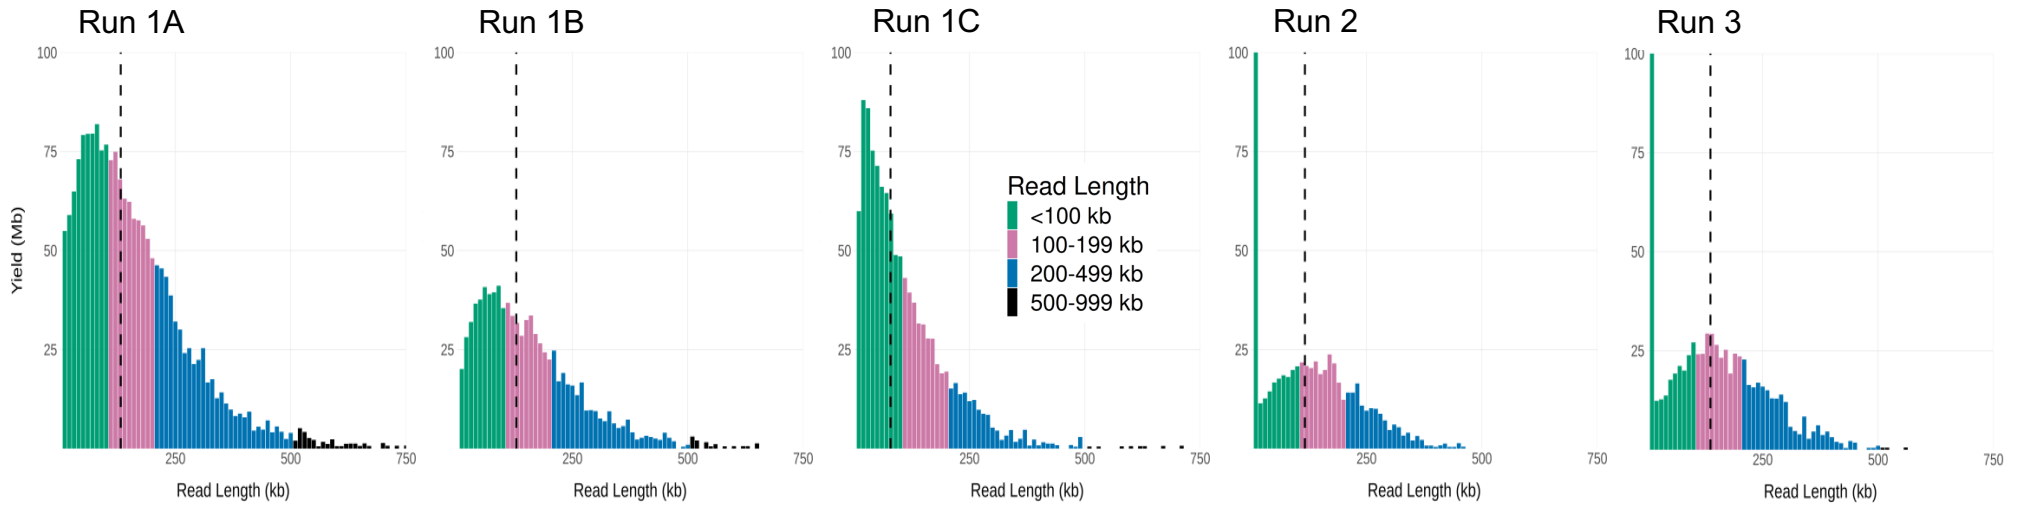

C

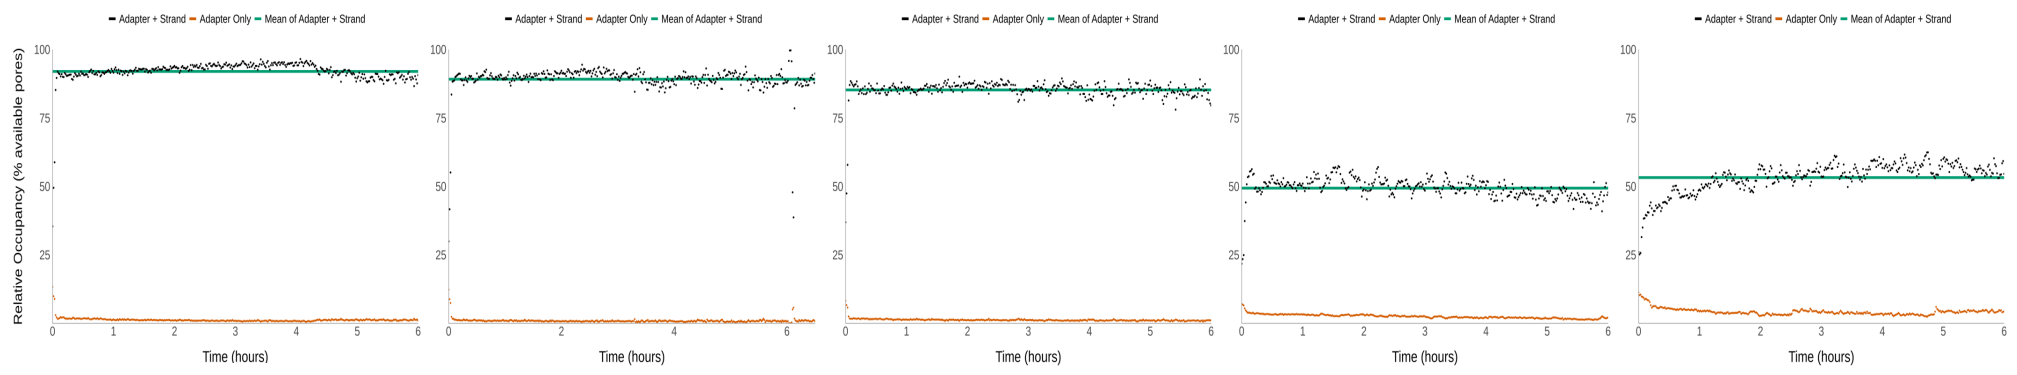

D

| Run | Monarch Extraction Type | %CV of Input Concentration (by Nanodrop) | Input DNA (est. $\mu$ g) | Reaction Volume (ml) | Reaction Time (min) | %CV of Library Concentration (by Nanodrop) | Loaded Library Amount ( $\mu$ g) | N50 (bp) | Yield (% Bases $\geq$ 100 kb) | Average Occupancy (%) | Yield per Pore (Mb) |
|-----|-------------------------|------------------------------------------|--------------------------|----------------------|---------------------|--------------------------------------------|----------------------------------|----------|-------------------------------|-----------------------|---------------------|
| 1A  | Nuclei Prep             | 130                                      | 10                       | 0.5                  | 5                   | 55.9                                       | 3.4                              | 133,867  | 1.84 Gb (62.59%)              | 92.4                  | 1.81                |
| 1B  | Nuclei Prep             |                                          |                          | 0.5                  | 10                  | 72.9                                       | 4.4                              | 131,329  | 0.86 Gb (61.86%)              | 89.8                  | 2.13                |
| 1C  | Nuclei Prep             |                                          |                          | 1                    | 5                   | 91.6                                       | 11.4                             | 80,395   | 1.09 Gb (41.59%)              | 85.52                 | 2.40                |
| 2   | Nuclei Prep             | 1.8                                      | 42                       | 1                    | 10                  | Not measured*                              | 11                               | 118,360  | 0.59 Gb (56.65%)              | 53.81                 | 1.00                |
| 3   | Direct Lysis            | 7.8                                      | 36                       | 1                    | 10                  | Not measured*                              | 12                               | 138,751  | 0.72 Gb (64.03%)              | 49.56                 | 1.03                |

(\*) %CV was not measured by Nanodrop as input DNA samples were relatively homogeneous

**Figure S9.** *FindingNemo in one day*: an UL sequencing protocol that extracts UHMW DNA from human cells and sequencing it in a working day (a) The protocol workflow along with the estimated step durations (b) Read length distributions of the libraries extracted using the Monarch kit; dashed black vertical lines denote N50s (c) Occupancy time lapses, (d) DNA and sequencing metrics of the libraries. Samples were extracted from GM12878 cells, each library was loaded on a MinION flow cell and run on the GridION platform. Data are after 6 hours of sequencing (excluding the first 10 minutes).
