# Supplementary material for: An optimized toolkit for high-molecular-weight DNA extraction and ultra-long-read nanopore sequencing using glass beads and hexamminecobalt(III) chloride
Source: HighWire-hosted journal article supplement (doi:10.1101/gr.279943.124), 2025-03-24
Supplement: Supplemental_Figure_S10.pdf [file Supplemental_Figure_S10.pdf]

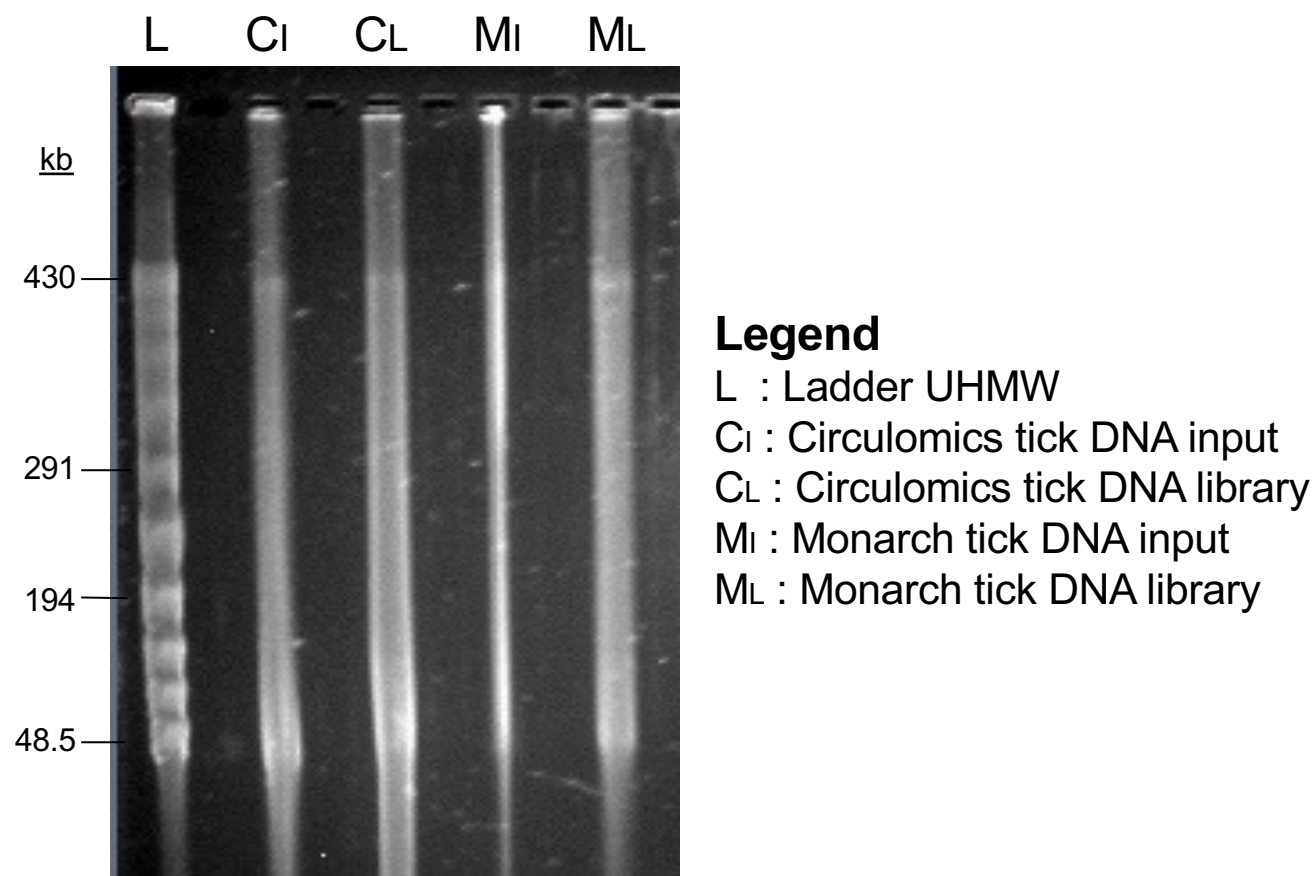

**Figure S10.** Pulsed-field gel electrophoresis of tick DNA samples prior to and after library preparation based on two different extraction methods: Circulomics and Monarch kit. Agarose gel was at 0.75% concentration and was run using Pippin Pulse at the pre-set protocol “5-430 kb” for 16 hours.
