# Supplementary material for: An optimized toolkit for high-molecular-weight DNA extraction and ultra-long-read nanopore sequencing using glass beads and hexamminecobalt(III) chloride
Source: HighWire-hosted journal article supplement (doi:10.1101/gr.279943.124), 2025-03-24
Supplement: Supplemental_Table_S1.docx [file Supplemental_Table_S1.docx]

Table S1. Sequencing metrics comparison of different library preparation protocols

| **Library** | **Run Hours (h)** | **N50  (bp)** | **Pores**  **Used** | **Yield**  **(% Bases > 100 kb)** | **Yield per Pore (Mb)** | **Average Occupancy  (%)** |
| --- | --- | --- | --- | --- | --- | --- |
| **Previous UL Protocols** | | | | | | |
| 1. Quick's UL V3 (1) | 6 | 90,018 | 1063 | 1.86 Gb (44.53%) | 1.75 | 76.12 |
| 1. Quick's UL V3 (2) | 6 | 92,728 | 1506 | 1.91 Gb (46.74%) | 1.27 | 91.45 |
| 1. KrazyStarFish (1) | 6 | 151,704 | 1211 | 1.25 Gb (66.48%) | 1.03 | 65.96 |
| 1. KrazyStarFish (2) | 6 | 120,318 | 820 | 1.20 Gb (58.39%) | 1.47 | 66.23 |
| **New UL Protocols** | | | | | | |
| 1. ULK001 | 6 | 147,123 | 1025 | 3.27 Gb (64.85%) | 3.19 | 95.01 |
| 1. ULK001-Nemo | 6 | 129,678 | 995 | 2.99 Gb (61.71%) | 3.00 | 94.12 |
| 1. RAD004-Nemo | 6 | 144,579 | 986 | 2.61 Gb (65.37%) | 2.65 | 90.97 |
