# Supplementary material for: An optimized toolkit for high-molecular-weight DNA extraction and ultra-long-read nanopore sequencing using glass beads and hexamminecobalt(III) chloride
Source: HighWire-hosted journal article supplement (doi:10.1101/gr.279943.124), 2025-03-24
Supplement: Supplemental_Table_S2.docx [file Supplemental_Table_S2.docx]

**Table S2A – Sequencing Metrics at 6 Hours of Run**

| **Protocol** | **N50  (bp)** | **Pores Used** | **Yield**  **(% Bases > 100 kb)** | **Yield per Pore (Mb)** | **Average Occupancy  (%)** |
| --- | --- | --- | --- | --- | --- |
| ULK001-Control | 147,123 | 1025 | 3.27 Gb (64.85%) | 3.19 | 95.01 |
| ULK001-Nemo | 129,678 | 995 | 2.99 Gb (61.71%) | 3.00 | 94.12 |
| RAD004-Nemo | 144,579 | 986 | 2.61 Gb (65.37%) | 2.65 | 90.97 |

**Table S2B –** **Sequencing Metrics by Load (~24 Hours each)**

| **Protocol** | **N50 (bp)** | **Pores Used** | **Yield**  **(% Bases > 100 kb)** | **Yield per Pore per Load (Mb)** | **Average**  **Occupancy (%)** |
| --- | --- | --- | --- | --- | --- |
| ULK001-Control | 139,889 | 1667 | 7.75 Gb (63.04%) | 4.65 | 92.26 |
| 149,073 | 1332 | 6.26 Gb (66.11%) | 4.70 | 92.23 |
| 142,303 | 999 | 3.85 Gb (64.44%) | 3.85 | 90.12 |
| ULK001-Nemo | 123,210 | 1301 | 5.57 Gb (59.25%) | 4.28 | 91.08 |
| 120,287 | 1211 | 5.06 Gb (58.58%) | 4.18 | 92.60 |
| 121,162 | 1128 | 4.40 Gb (58.59%) | 3.90 | 88.39 |
| RAD004-Nemo | 139,891 | 1355 | 4.51 Gb (64.1%) | 3.33 | 88.92 |
| 142,029 | 1224 | 4.14 Gb (65.11%) | 3.38 | 90.01 |
| 140,512 | 1118 | 3.44 Gb (64.66%) | 3.07 | 88.17 |

**Table S2C – Averaged Metrics per Load (~24 Hours each)**

| **Protocol** | **Yield per Load (Gb)*** | **Yield per Pore**  **per Load (Mb)*** |
| --- | --- | --- |
| ULK001-Control | 5.95 ± 1.60 | 4.40 ± 0.39 |
| ULK001-Nemo | 5.01 ± 0.48 | 4.12 ± 0.16 |
| RAD004-Nemo | 4.03 ± 0.45 | 3.26 ± 0.14 |

(*) values are means and standard deviation of the means
