# Supplementary material for: An optimized toolkit for high-molecular-weight DNA extraction and ultra-long-read nanopore sequencing using glass beads and hexamminecobalt(III) chloride
Source: HighWire-hosted journal article supplement (doi:10.1101/gr.279943.124), 2025-03-24
Supplement: Supplemental_Table_S3.docx [file Supplemental_Table_S3.docx]

**Table S3. Metrics of library preparation with or without Nemo clean-up method (4 hours of runs)**

| **Library Prep Protocol** | **N50 (bp)** | **Pores Used** | **Yield  (% long reads**  **> 100 kb)** | **Yield per Pore (Mb)** | **Relative Occupancy**  **(% free adapters)** |
| --- | --- | --- | --- | --- | --- |
| Quick's only | 85,828 | 1621 | 1.66 Gb (44.44%) | 1.03 | 93.47% (5.8%) |
| Quick's with Nemo clean-up | 83,574 | 668 | 0.83 Gb (44.35%) | 1.24 | 75.34% (10.95%) |
| KSF only | 70,659 | 887 | 0.53 Gb (34.79%) | 0.59 | 62.61% (20.05%) |
| KSF with Nemo clean-up | 59,592 | 820 | 1.03 Gb (27.94%) | 1.26 | 69.14% (0.98%) |
