# Supplementary material for: An optimized toolkit for high-molecular-weight DNA extraction and ultra-long-read nanopore sequencing using glass beads and hexamminecobalt(III) chloride
Source: HighWire-hosted journal article supplement (doi:10.1101/gr.279943.124), 2025-03-24
Supplement: Supplemental_Table_S4.docx [file Supplemental_Table_S4.docx]

**Table S4 Library prep conditions and sequencing metrics of samples extracted using the NEB Monarch kit (6 hours)**

| **1** | **2** | **3** | **4** | **5** | **6** | **7** | **8** | **9** | **10** | **11** | **12** | **13** |
| --- | --- | --- | --- | --- | --- | --- | --- | --- | --- | --- | --- | --- |
| **Sample** | **Input Cell No.** | **Extraction Type** | **Lysis Speed (rpm)** | **Library Kit** | **Preparation Time** | **Input DNA (mg)** | **Clean-up Method** | **Loaded DNA (mg)** | **N50 (bp)** | **Yield (% Bases**  **> 100 kb)** | **Average Occupancy (%)** | **Yield per Pore (Mb)** |
|  |
| Monarch-01 | 1 million | Nuclei Prep | 300 | ULK001 | Standard | 5 | Nemo | 2 | 124,929 | 2.10 Gb  (60.18%) | 94.43 | 2.71 |  |
| Monarch-02 | 1 million | Nuclei Prep | 300 | ULK001 | Standard | 5 | Nemo | 1 | 112,810 | 1.25 Gb  (55.99%) | 88.80 | 2.43 |  |
| Monarch-03 | 3 million | Nuclei Prep | 700 | ULK001 | Standard | 16 | Nemo | 9.5 | 141,094 | 1.36 Gb  (66.69%) | 61.19 | 1.51 |  |
| Monarch-04 | 3 million | Nuclei Prep | 900 | ULK001 | Standard | 20 | Nanobind | 18.8 | 106,493 | 3.35 Gb  (52.7%) | 97.36 | 3.89 |  |
| Monarch-05 | unknown | Nuclei Prep | 900 | RAD004 | Standard | 2 | Nemo | 1.3 | 99,327 | 0.56 Gb  (49.55%) | 41.59 | 1.06 |  |
| Monarch-06 | 3 million | Direct Lysis | 0 | ULK001 | Standard | 20 | Nemo | 15 | 67,006 | 0.41 Gb (34.05%) | 55.92 | 1.46 |  |
| Monarch-07 | 3 million | Direct Lysis | 700 | ULK001 | Standard | 21 | Nemo | 5 | 142,923 | 1.42 Gb (67.73%) | 79.02 | 1.53 |  |
| Monarch-08 | 1.5 million | Direct Lysis | 700 | ULK001 | Standard | 10 | ONT | 1.5 | 153,295 | 1.59 Gb (72.55%) | 85.65 | 1.57 |  |
|  |
| Monarch-09 | 1.5 million | Direct Lysis | 700 | ULK001 | Standard | 10 | Nemo | 3 | 152,653 | 1.61 Gb  (72.2%) | 89.29 | 2.03 |  |
| Monarch-10 | 1.5 million | Direct Lysis | 700 | ULK001 | Standard | 10 | Spermine + | 5 | 147,386 | 1.28 Gb (69.51%) | 85.32 | 2.01 |  |
| glass beads |  |
| One Day 1A | 2 million | Nuclei Prep | 600 | ULK001 | One day | 10 | Nemo | 3.5 | 133,867 | 1.84 Gb (62.59%) | 92.40 | 1.81 |  |
| One Day 1B | 2 million | Nuclei Prep | 600 | ULK001 | One day | 10 | Nemo | 11.5 | 80,395 | 1.09 Gb (41.59%) | 85.52 | 2.40 |  |
| One Day 1C | 2 million | Nuclei Prep | 600 | ULK001 | One day | 10 | Nemo | 4.5 | 131,329 | 0.86 Gb (61.86%) | 89.80 | 2.13 |  |
| One Day 2 | 3 million | Nuclei Prep | 800 | ULK001 | One day | 42 | Nemo | 11 | 118,360 | 0.59 Gb (56.65%) | 53.81 | 1.00 |  |
| One Day 3 | 3 million | Direct Lysis | 800 | ULK001 | One day | 36 | Nemo | 12 | 138,751 | 0.72 Gb (64.03%) | 49.56 | 1.03 |  |
