# Supplementary material for: An optimized toolkit for high-molecular-weight DNA extraction and ultra-long-read nanopore sequencing using glass beads and hexamminecobalt(III) chloride
Source: HighWire-hosted journal article supplement (doi:10.1101/gr.279943.124), 2025-03-24
Supplement: Supplemental_Table_S5.docx [file Supplemental_Table_S5.docx]

**Table S5. Comparison of tick cell runs on MinION vs PromethION platform**

| **Sample-Extraction** | **Platform** | **N50 (bp)** | **Used Pores** | **Yield  (% Bases > 100 kb)** | **Yield per Pore (Mb)** | **Average Occupancy (%)** |
| --- | --- | --- | --- | --- | --- | --- |
| Tick-Circulomics | MinION | 109,486 | 527 | 1.55 Gb (52.98%) | 2.94 | 80.11 |
| PromethION | 104,993 | 3492 | 11.11 Gb (51.64%) | 3.18 | 87.50 |
| Tick-Monarch | MinION | 123,683 | 617 | 1.85 Gb (60.25%) | 2.99 | 84.71 |
| PromethION | 126,008 | 3902 | 15.01 Gb (61.46%) | 3.85 | 88.20 |
